# Supplementary material
Source: publisher site journal article supplement (https://www.dovepress.com/article/403314)
Supplement: Supplementary file 1 [file get_supplementary_file.php]

Table S1 The complete search strategy of this meta-analysis

| (Uric Acid OR Acid, Uric OR serum uric acid OR SUA OR hyperuricemia OR UA OR 2,6,8-Trihydroxypurine OR Trioxopurine OR Potassium Urate OR Urate, Potassium OR Urate OR Ammonium Acid Urate OR Acid Urate, Ammonium OR Urate, Ammonium Acid OR Sodium Urate Monohydrate OR Monohydrate, Sodium Urate OR Urate Monohydrate, Sodium OR Monosodium Urate Monohydrate OR Monohydrate, Monosodium Urate OR Urate Monohydrate, Monosodium OR Sodium Acid Urate Monohydrate OR Sodium Urate OR Urate, Sodium OR Monosodium Urate OR Urate, Monosodium OR Sodium Acid Urate OR Acid Urate, Sodium OR Urate, Sodium Acid) AND (Non-alcoholic Fatty Liver Disease OR Non alcoholic Fatty Liver Disease OR non-alcoholic steatohepatitis OR NAFLD OR NASH OR Nonalcoholic Fatty Liver Disease OR non-alcoholic liver disease OR nonalcoholic liver disease OR Fatty Liver, Nonalcoholic OR Fatty Livers, Nonalcoholic OR Liver, Nonalcoholic Fatty OR Livers, Nonalcoholic Fatty OR Nonalcoholic Fatty Liver OR Nonalcoholic Fatty Livers OR Nonalcoholic Steatohepatitis OR non-alcoholic steato-hepatitis OR Nonalcoholic Steatohepatitides OR Steatohepatitides, Nonalcoholic OR Steatohepatitis, Nonalcoholic OR Fatty Liver OR Liver, Fatty OR bright liver OR hepatic steatosis OR Steatohepatitis OR steatosis OR Steatohepatitides OR Steatosis of Liver OR Visceral Steatosis OR Steatoses, Visceral OR Steatosis, Visceral OR Visceral Steatoses OR Liver Steatosis OR Liver Steatoses OR Steatoses, Liver OR Steatosis, Liver OR transaminases OR ALT OR AST OR liver enzyme) |
| --- |

Table S2 Complete information of the included studies in the meta-analysis of the relationship between SUA levels and NAFLD

| First Author | Year | Region | Study design | follow-up(years) | Subjects/with NAFLD(% male) | Age/range Mean(SD) | Comparison | Diagnosis of NAFLD | Diagnosis of hyperuricemia | Adjusted covariates | OR/HR(95%CI) |
| --- | --- | --- | --- | --- | --- | --- | --- | --- | --- | --- | --- |
| Bai, J.X. 1 | 2018 | China | Cohort Study | 5 | 856/164(-) | 47.05±8.55 | Highest vs lowest quartile 328-629umol/L vs 109-221umol/L | ultrasonography | - | - | 5.143(2.823-9.337) |
| Bao, T. 2 | 2020 | China | Cross-Sectional Study | 1 | 4323/1709(0%) | 46.5±11.3 | Highest vs lowest quartile ≥311umol/L vs ≤ 230umol/L | ultrasonography | - | Age, current smoking status, current alcohol drinking status, diabetes, hypertension disease, triglyceride | 1.961(1.412-2.724) |
| Cai, W. 3 | 2014 | China | Cross-Sectional Study | 2 | 2241/984(54.17%) | 43.2±10.4 | HUA(+) vs HUA(-) | ultrasonography | SUA＞420umol/L in male and SUA>360 umol/L in female | Age, sex ,hypertension, BMI, FPG, TG, TC, HDL-C, smoking, physical activity, ALT, AST | 2.628(1.608-4.294) |
| Cai, W. 4 | 2013 | China | Cross-Sectional Study | 1 | 10605/3906(-) | 42.85±12.12 | Highest vs lowest quintile M:≥417umol/L F:≥357umol/L vs M:≤281.68umol/L F:≤194 umol/L | ultrasonography | SUA≥417umol/L in male and SUA≥357umol/L in female | Age, Sex, hypertension, diabetes, dyslipidemia, and obesity. | 3.129(2.525-3.878) |
| Catanzaro, R. 5 | 2014 | Italy | Cross-Sectional Study | 1 | 322/176(-) | 54.5±16.4 | Highest vs lowest quartile M:＞375umol/L F:＞292umol/L vs M:≤262umol/L F:≤214 umol/L | ultrasonography | - | sex and MS components | 3.01 (1.4-6.49) |
| Chen, Y. 6 | 2019 | China | Cross-Sectional Study | 4 | 6043/2009(0%) | 45.9±12.8 | Highest vs lowest quartile | ultrasonography | - | Age, education level, income, BMI, hypertension, diabetes, hyperlipemia | 1.86 (1.53-2.26) |
| Cho, H. C. 7 | 2016 | Korea | Cross-Sectional Study | 1 | 1711/213(80.2%) | 43.12±6.53 | HUA(+) vs HUA(-) | ultrasonography | SUA＞416.5umol/L in male and SUA>386.75umol/L in female | BMIs, HOMA-IR, ALT, triglyceride, Age, Male sex, Abdominal obesity, BP, AST ALT, CRP, MS | 2.200(1.365-3.546) |
| Cui, L. F. 8 | 2017 | China | Cross-Sectional Study | 1 | 100226/25876(79.87%) | - | HUA(+) vs HUA(-) | ultrasonography | SUA＞416.5umol/L in male and SUA>357umol/L in female | age, WC, TC, TG, hsCRP, hypertension , eGFR, prolonged sitting, frequent alcohol consumption and oral diuretic administration, duration of sleep | 1.768(1.548-2.019) |
| Cui, Y. L. 9 | 2021 | China | Cross-Sectional Study | 7 | ＜25kg/m2、 T2DM patients:400/249(68.25%) | 51.40±11.70 | Highest vs lowest quartile ＞346.5umol/L vs ＜237.4umol/L | ultrasonography | - | gender, age, BMI, SBP, DBP, A1C, FIN, FBG, TC, TG, LDL, HDL, SUN and Cr | 2.94 (1.25-6.94) |
| Fan, N. G. 10 | 2016 | China | Cross-Sectional Study | 1 | T2DM,541/306(50.09%) | 58.03±13.41 | Highest vs lowest tertile M:≥338.4umol/L vs ≤265.6umol/L F:≥299.4umol/L vs ≤232.0umol/L | ultrasonography | - | age, duration of diabetes, SBP , DBP ,BMI, insulin and OADs therapy, FPG, HbA1C, TG, TC, LDL-C, HDL-C, eGFR, and HOMA-IR | 2.041(0.576-7.238) |
| Han, L. 11 | 2022 | China | Cross-Sectional Study | 1 | high-income male：275/190(100%) | 48.90±6.05 | HUA(+) vs HUA(-) | ultrasonography | - | Dietary greasiness, age, BMI, Number of combined metabolic diseases, diabetes | 1.415 (0.705-2.839) |
| Hu, M. Y. 12 | 2017 | China | Cross-Sectional Study | 1 | 6241/-(52.41%) | 46.26±11.79 | HUA(+) vs HUA(-) | ultrasonography | SUA＞420umol/L in male and SUA>360umol/L in female | BMI, TG , Gender, Hypertension, High LDL-C | 1.841(1.553-2.183) |
| Hu, X. Y. 13 | 2018 | China | Cross-Sectional Study | 1 | 447/102(38.3%) | 44.3±11.9 | HUA(+) vs HUA(-) | ultrasonography | SUA＞416umol/L in male and SUA>357umol/L in female | Sphingosine, OAHOA | 2.755(2.009-3.778) |
| Hu, Y. M. 14 | 2021 | China | Cross-Sectional Study | 9 | T2DM:2809/1453(63.51) | 56.35±12.15 | Highest vs lowest quartile M:≥390.7umol/L F:≥338.9 vs M:＜269.0umol/L F:＜220.6umol/L | ultrasonography | - | age, BMI, duration, SBP, DBP, BUN, Scr, Alb, eGFR, TC, TG, HDL-c, LDL-c, FFA, FBG, PBG and HbA1c. | 1.592(1.008-2.512) |
| Hwang, I. C. 15 | 2011 | Korea | Cross-Sectional Study | 2 | 9019/2124(51.36%) | 41.71±11.57 | Highest vs lowest quartile 380.8-428.4umol/L vs ＜303.45umol/L | ultrasonography | - | "smoking status, regular exercise, body mass index, blood pressure, fasting plasma glucose, total cholesterol, triglyceride, HDL cholesterol ,aspartate aminotransferase, alanine aminotransferase, γ-glutamyltransferase, age" | 1.689(1.178-2.422) |
| Kuo, C. F. 16 | 2010 | China | Cross-Sectional Study | 6 | 54325/6169(54.21%) | 49.2±13 | Gout(+) vs Gout(-) | ultrasonography | - | age, sex, metabolic syndrome and low estimated glomerular filtration rate . | 1.42(1.25-1.60) |
| Lee, J. W. 17 | 2010 | Korea | Cohort study | 5 | 4954/644(50.50%) | 40.0±5.9 | Highest vs lowest quartile 351.05-749.7 umol/L vs 35.7- 232.05umol/L | ultrasonography | - | Age Gender FPG ALT Fasting insulin Bilirubin Alcohol Smoking status Regular exercise Educational background BMI | 1.84 (1.25-2.71) |
| Lee, K. 18 | 2009 | Korea | Cross-Sectional Study | 1 | 13621/3569(53.01%) | - | HUA(+) vs HUA(-) | ultrasonography | SUA＞416.5umol/L in male and SUA>357umol/L in female | Age BP HDL Triglycerides Glucose AST ALT GGT | 1.702(1.502-1.929) |
| Lee, Y. J. 19 | 2010 | Korea | Cross-Sectional Study | 1 | 3768/-(56.61%) | 46.07±10.57 | Highest vs lowest quartile M:≥380.8umol/L vs ≤291.5umol/L F:≥267.8umol/L vs ≤202.2umol/L | ultrasonography | - | age, smoking status, regular exercise, body mass index, blood pressure, fasting plasma glucose, triglyceride, and HDL cholesterol, aspartate aminotransferase alanine amino transferase, g-glutamyltransferase, and log transformed hsCRP | 1.778(1.366-2.315) |
| Li, Y. 20 | 2017 | China | Case–Control Study | - | 1971/438(42.87%) | ＞60 | Highest vs lowest quartile ≥355umol/l vs ≤253umol/L | ultrasonography | SUA＞416umol/L in male and SUA>387umol/L in female | sex, age, creatinine, hypertension, ALT,AST,TC,HDL-C,FPG,BMI | 5.92 (3.39-10.33) |
| Li, Y.M. 21 | 2009 | China | Cross-Sectional Study | 1 | 8925/1051(67.32%) | 42.77±13.13 | HUA(+) vs HUA(-) | ultrasonography | SUA＞420umol/L in male and SUA>360umol/L in female | Male gender ,Age ,Body mass index, Waist circumference, c-Glutamyltransferase , Triglyceride ,HDL cholesterol , LDL cholesterol , Fasting plasma glucose | 1.291(1.067–1.564) |
| Liu, C.L. 22 | 2022 | China | Cross-Sectional Study | 0.17 | 1709/793(-) | 55(45-65) | Highest vs lowest quartile ≥379umol/l vs ≤275umol/L | ultrasonography | - | adjusted for age and BMI, SBP , DBP , ALT, AST, ALP , TBIL, TG, LDL-C, HDL-C, fasting glucose, HbA1C, meat consumption, and vegetable consumption | 1.579(1.140-2.189) |
| Liu, C. Q. 23 | 2016 | China | Cross-Sectional Study | - | 1365/809(30.85%) | 53.41±6.98 | HUA(+) vs HUA(-) | ultrasonography | SUA＞420umol/L in male and SUA>360umol/L in female | sex and age, educational level, ever smoking, ever drinking and regular physical exercise, waist, systolic blood pressure, triglyceride, HDLcholesterol, fasting plasma glucose and fasting insulin. | 1.992(1.516-2.618) |
|  |  |  |  |  |  |  | Highest vs lowest quartile 253.4±32.8umol/L vs 488.0±60.4umol/L |  |  |  | 2.475(1.622-3.777) |
| Liu, J. 24 | 2017 | China | Cross-Sectional Study | 2 | 4098/1619(63.04%) | 41.82±11.61 | HUA(+) vs HUA(-) | ultrasonography | SUA＞420umol/L in male and SUA>360umol/L in female | age, sex, FPG, HDL ,LDL, Hypertriglyceridemia | 2.046(1.366-3.064) |
| Liu, P. J. 25 | 2014 | China | Cohort Study | 1 | postmenopausal women:1425/468(0%) | 58.20±8.76 | Highest vs lowest quartile 303.5-357umol/L vs ≤226.1umol/L | ultrasonography | - | age, waist circumference, high blood pressure, ALT, AST, TC, TG, HDL, LDL, FBG, SCr, BUN,BMI | 3.1(2.027-4.74) |
| Liu, P. J. 26 | 2014 | China | Cross-Sectional Study | 0.5 | postmenopausal women:528/121(0%) | 53(48-59) | Highest vs lowest quartile 303.5-357umol/L vs ≤226.1umol/L | ultrasonography | - | waist circumference, high blood pressure, γ-GGT, blood urea nitrogen, serum creatinine, triglycerides, age, metabolic syndrome status, drinking status, and smoking status | 2.652(1.323-5.319) |
| Ma, Z. M. 27 | 2020 | China | Cohort Study | 4 | 6495/-(54.41%) | - | HUA(+) vs HUA(-) | ultrasonography | SUA＞420umol/L in male and SUA>360umol/L in female | adjusted for baseline degree of hepatic steatosis, age, sex, drinking, smoking, dietary habits, exercise, BMI, abdominal obesity, VAI, BUN, SCr, eGFR, ALT, AST, GGT, dyslipidemia, hyperglycemia, hypertension, metabolic syndrome, diabetes, and use of anti-dyslipidemia medication. | 1.5970 (1.2980-1.9660) |
| Pan, X. T. 28 | 2020 | China | Cross-Sectional Study | 2 | han:1223/574(46.4%) | 43(31-51) | HUA(+) vs HUA(-) | ultrasonography | SUA＞420umol/L in male and SUA>360umol/L in female | BMI, waist circumference, triglyceride, HDL, ALT, fried food consumption ,diabetes, tuber consumption | 1.786(1.169-2.730) |
| Ryu, S. 29 | 2011 | Korea | Cohort Study | 6 | 5741/1717(100%) | 36.7±4.9 | HUA(+) vs HUA(-) | ultrasonography | SUA≥416.5umol/L | age, BMI, smoking, alcohol intake, and exercise, total cholesterol, HDL cholesterol, triglycerides, glucose, systolic blood pressure, insulin, hsCRP, and the presence of metabolic syndrome. | 1.21 (1.07-1.38) |
|  |  |  |  |  |  |  | Highest vs lowest quartile ≥386.75umol/l vs ≤309.4umol/L |  |  |  | 1.34 (1.15-1.55) |
| Shen, Y. 30 | 2019 | China | Cross-Sectional Study | 0.17 | high altitudes:4180/1065(72.11%) | 40.47±8.96 | HUA(+) vs HUA(-) | ultrasonography | SUA＞416umol/L in male and SUA>357umol/L in female | Age, Education, Job position, Hypertension, BMI, Hyperlipidemia, Diabetes, Working altitude, Work schedule, Current smoking, Frequent drinking, Low intake of vegetable and fruit, Preferred dietary pattern | 1.569(1.290-1.910) |
| Shih, M. H. 31 | 2012 | USA | Cross-Sectional Study | 6 | 5370/956(47.6%) | 40.8(40.3-41.4) | HUA(+) vs HUA(-) | ultrasonography | SUA＞416.5umol/L in male and SUA> 339.2umol/L in female | age, sex, race/ethnicity, alcohol consumption, body mass index, (systolic) blood pressure, fasting glucose, high-density lipoprotein cholesterol and triglycerides. | 1.4(1.1-1.9) |
|  |  |  |  |  |  |  | Highest vs lowest quintile M:422.5-678.3umol/L F:285.6-327.3umol/L vs M:101.2-303.5umol/L F:47.6-214.2umol/L |  |  |  | 1.7(1.1-2.5) |
| Sirota, J. C. 32 | 2013 | USA | Cross-Sectional Study | 6 | 10732/954(45.88%) | - | Highest vs lowest quartile M:＞410.6umol/L F:＞315.4umol/L vs M:＜309.4umol/L F:＜220.2umol/L | ultrasonography | SUA＞416.5umol/L in male and SUA> 339.2umol/L in female | Adjusted for: age, gender, race, history of hypertension, waist circumference, triglycerides, high density lipoprotein cholesterol, estimated glomerular filtration rate, homeostatic model of insulin resistance, aspartate aminotransferase | 1.43(1.16-1.76) |
| Tang, Y. 33 | 2022 | China | Cohort Study | 2 | 8429/2007(-) | - | Highest vs lowest quartile M:≥363.0umol/L F:≥288.0umol/L vs M:＜266.0umol/L F:＜210.0umol/L | ultrasonography | - | age, sex , BMI , smoking, drinking , physical activity ,prevalence of CHD, hypertension, diabetes, ALT concentration , Cre concentration ,and FPG concentration | 1.71 (1.45, 2.01) |
| Tung, T. H. 34 | 2011 | China | Cross-Sectional Study | 1 | taxi drivers：1635/1085(94.25%) | 49.62±7.67 | HUA(+) vs HUA(-) | ultrasonography | SUA≥416.5umol/L in male and SUA≥357umol/L in female | Sex, Age, Hypertension, BMI, AST, ALT, Hypercholesterolemia , Hypertriglyceridemia, Higher fasting plasma glucose | 1.79(1.07-3.00) |
| Wang, M. 35 | 2021 | China | Cross-Sectional Study | 0.17 | 3311/1233(73.85%) | 40.08±9.42 | Highest vs lowest quartile ≥395umol/l vs ≤280umol/L | ultrasonography | - | gender, age, BMI, SBP, DBP, AST, FPG, TG, TC. | 2.44(1.76-3.38) |
| Wang, Z. 36 | 2013 | China | Cross-Sectional Study | 1 | 1977/1194(0%) | 45-55 | HUA(+) vs HUA(-) | ultrasonography | SUA≥360umol/L in female | BMI, TG, HDL, ALT, AAR, FBS, BMI, age, ALT, and TG. | 4.92 (0.85-28.44) |
| Wei, F. 37 | 2020 | China | Cohort Study | 4 | 2832/962(68.75%) | 62.91±15.23 | Highest vs lowest quartile ≥362umol/l vs ＜258umol/L | ultrasonography | SUA≥420umol/L in male and SUA≥360umol/L in female | age, gender, BMI, SBP , DBP , ALT , TP , ALB, SCR, FBG, HbA1c, TGs, HDL-C, LDL-C | 1.666(1.287-2.157) |
| Wu, S. J. 38 | 2015 | China | Cross-Sectional Study | 3 | 49092(54.35%) | 42.24±10.31 | Highest vs lowest quartile M:≥436umol/L F:≥311umol/L vs M:≤330umol/L F:≤230umol/L | ultrasonography | - | sex, age, body mass index, systolic blood pressure, fasting plasma glucose, albumin, alanine aminotransferase, aspartate aminotransferase, blood urea nitrogen, creatinine, total cholesterol, triglyceride, high-density lipoprotein cholesterol, and low-density lipoprotein cholestero | 1.903(1.748–2.072) |
| Wu, S. J. 38 | 2015 | China | Cohort Study | 3.5 | 11363(51.49%) | 40.98±12.50 | Highest vs lowest quartile M:≥436umol/L F:≥311umol/L vs M:≤330umol/L F:≤230umol/L | ultrasonography | - | sex, age, body mass index, systolic blood pressure, fasting plasma glucose, albumin, alanine aminotransferase, aspartate aminotransferase, blood urea nitrogen, creatinine, total cholesterol, triglyceride, high-density lipoprotein cholesterol, and low-density lipoprotein cholestero | 1.589(1.310–1.927) |
| Xie, Y. 39 | 2013 | China | Cohort Study | 1 | 1440/379(100%) | 20-69 | Highest vs lowest quartile 288.36±1.8 vs 490.46±3.0 | ultrasonography | SUA≥420umol/L in male | age, smoking, drinking, body mass index, homeostasis model assessment of insulin resistance, C-reactive protein, creatinine, alanine aminotransferase (ALT) and components of metabolic syndrome | 2.81(1.66-4.76) |
| Xu, C. 40 | 2010 | China | Cohort Study | 3 | 6890/813(65.20%) | 44.4±12.7 | Highest vs lowest quintile M:≥410umol/L F:≥299umol/L vs M:≤295umol/L F:≤205umol/L | ultrasonography | SUA＞420umol/L in male and SUA>360umol/L in female | age, gender, alcohol intake, BMI, waist circumference, systolic blood pressure, diastolic blood pressure, alanine aminotransferase, aspartate aminotransferase, c-glutamyltransferase, triglyceride, total cholesterol, HDL cholesterol, LDL cholesterol, fasting plasma glucose, creatinine and blood urea nitrogen. | 1.62(1.26-2.08) |
| Yamada, T. 41 | 2010 | Japan | Cohort Study | 5 | 4118/433(25.3%) | 51.70±9.75 | Highest vs lowest quartile M:≥386.8umol/l vs ＜297.5umol/L F:≥291.6umol/l vs ＜220.2umol/L | ultrasonography | SUA＞416.5umol/L | adjusted for age, BMI, BMI increase for 5 years, systolic blood pressure, triglyceride, fasting blood glucose, and smoling status. | 2.000(1.417-2.823) |
| Yang, C. 42 | 2022 | China | Cohort Study | 9 | 8045/1634(-) | - | HUA(+) vs HUA(-) | ultrasonography | SUA＞420umol/L in male and SUA>360 umol/L in female | age, sex, low-density lipoprotein cholesterol (LDL-C), fasting blood glucose (FBG), alanine aminotransferase (ALT), blood urea nitrogen (BUN), systolic blood pressure (SBP), triglycerides (TG), insulin resistance. | 1.765(1.512-2.060) |
| Yang, C. 42 | 2022 | China | Cross-Sectional Study |  | 1587962/635977(60.34%) | 46.00(36.00-55.00) | HUA(+) vs HUA(-) | ultrasonography | SUA＞420umol/L in male and SUA>360umol/L in female | age, sex, low-density lipoprotein cholesterol (LDL-C), fasting blood glucose (FBG), alanine aminotransferase (ALT), blood urea nitrogen (BUN), systolic blood pressure (SBP), triglycerides (TG). | 2.048(2.026-2.070) |
| Yang, C. 43 | 2017 | China | Cohort Study | 4 | 2383/363(49.9%) | 40.80±12.18 | HUA(+) vs HUA(-) | ultrasonography | SUA＞420umol/L in male and SUA>360umol/L in female | age, gender, TC, TG, HDL-c, LDL-c, FPG, Cr, BUN, SUA, AST, ALT, SBP, DBP and BMI | 1.416(1.103-1.819) |
| Yang, H. H. 44 | 2018 | China | Cross-Sectional Study | 0.75 | 7569/2229(41.3%) | 60±13 | Highest vs lowest quintile <230umol/L vs ≥367 umol/L | ultrasonography | SUA＞420umol/L in male and SUA>360umol/L in female | adjusted for age, sex (only for all participants), BMI, history of cardiovascular related diseases, DBP , serum AST, TG, TC, HDL and FPG | 4.34(3.39-5.54) |
| Yu, H. F. 45 | 2021 | China | Cross-Sectional Study | 6.5 | T2DM:583/356(46.66%) | 54.40±15.26 | Highest vs lowest tertile ＞354umol/L vs ＜278umol/L | ultrasonography | - | age, gender, T2DM duration, BMI, SBP, drinking history, and eGFR,TGs, HbA1c, HOMA-IR, usage of statin, or anti-hypertensive drugs , FC-P, HDL-C, AST, and ALT | 2.315(1.272-4.213) |
| Yu, X. L. 46 | 2017 | China | Cross-Sectional Study | 2 | 1006/348(46.62%) | 50.97±4.65 | HUA(+) vs HUA(-) | ultrasonography | SUA＞420umol/L in male and SUA>360umol/L in female | age, educational level, diastolic blood pressure, fasting glucose, triglycerides, total cholesterol, high- and low-density lipoprotein–cholesterol, and obesity. | 2.205(1.355-3.589) |
|  |  |  |  |  |  |  | Highest vs lowest quartile |  |  |  | 1.498(0.966-2.323) |
| Zhang, S. 47 | 2017 | China | Cross-Sectional Study | 1 | ＜25kg/m2:6842/1631(59.57%) | - | elevated UA vs normal UA M:≥380.8umol/L vs ≤374.9umol/L F:≥291.6umol/L vs ≤285.6umol/L | ultrasonography | - | age | 2.115(1.849-2.420) |
| Zheng, X. Y. 48 | 2017 | China | Cross-Sectional Study | 5 | BMI≤25 kg/m2:91924/7503(51.64%) | - | HUA(+) vs HUA(-) | ultrasonography | SUA＞420umol/L in male and SUA>360 umol/L in female | higher age, HBP , central obesity, lipid disorder, and abnormal ALT | 1.718(1.622-1.820) |

OR, odds ratio; HR, hazard ratio; CI, confidence interval; SD, standard deviation; NAFLD, non-alcoholic fatty liver disease; SUA, serum uric acid.

Table S3 Characteristics of the included studies in the meta-analysis of prevalence and incidence

| First Author | Year | Region | Study design | Duration of follow-up | Subjects (n) | Sex, males (%) | age | NAFLD | hyperuricemia | Prevalence/Incidence | Diagnostic method(NAFLD) | Diagnosis of hyperuricemia |
| --- | --- | --- | --- | --- | --- | --- | --- | --- | --- | --- | --- | --- |
| Wen Cai. 3 | 2014 | China | Cross-Sectional Study | 2 | 2241 | 54.17% | 43.2±10.4 | 147 | 188 | P:0.7819 | ultrasonography | SUA>420umol/L in male and SUA>360umol/L in female |
| Guanqun Chao. 49 | 2021 | China | Cross-Sectional Study | 2 | 55449 | 56.50% | 47±10.7 | 8389 | 16266 | P:0.5157 | imaging or histological examination | SUA>420umol/L in male and SUA>360umol/L in female |
| Sima Golmohammadi. 50 | 2020 | Iran | Cross-Sectional Study | 1 | CKD:450 | - | - | 160 | 241 | P:0.6639 | ultrasonography | SUA>420umol/L in male and SUA>360 umol/L in female |
| Li Han. 11 | 2022 | China | Cross-Sectional Study | 1 | high-income male:275 | 100% | 48.90±6.05 | 79 | 129 | P:0.6124 | ultrasonography | - |
| Ryu, S. 29 | 2011 | Korea | Cohort Study | 6 | all male:5741 | 100% | 36.7±4.9 | 305 | 770 | I:0.3961 | ultrasonography | SUA>420umol/L |
| Shih, M. H. 31 | 2012 | USA | Cohort Study | 6 | 5370 | 47.60% | 40.8(40.3-41.4) | 298 | 881 | I:0.3382 | ultrasonography | SUA>416.5umol/L in male and SUA> 339.2umol/L in female |
| Tung, T. H. 34 | 2011 | China | Cross-Sectional Study | 1 | taxi drivers:1635 | 94.25% | 49.62±7.67 | 956 | 1483 | P:0.6446 | ultrasonography | SUA≥416.5umol/L in male and SUA≥357umol/L in female |
| Yang, C. 42 | 2022 | China | Cross-Sectional Study | - | 1587962 | 60.34% | 44.00(35.00-54.00) | 144636 | 218796 | P:0.6611 | ultrasonography | SUA>420umol/L in male and SUA>360umol/L in female |
| Cohort Study | 9 | 16112 | - | - | 1634 | 8045 | I:0.2031 | ultrasonography | SUA>420umol/L in male and SUA>360umol/L in female |
| Yang, C. 43 | 2017 | China | Cohort Study | 4 | 2383 | 49.90% | 40.80±12.18 | 99 | 341 | I:0.2903 | ultrasonography | SUA>420umol/L in male and SUA>360umol/L in female |

P, prevalence; I, incidence; SUA, serum uric acid; NAFLD, non-alcoholic fatty liver disease.

Table S4 The quality assessment of cohort and case-control studies

| Study | Year | Selection | Comparability | Outcome | Total |
| --- | --- | --- | --- | --- | --- |
| Cohort study | | | | | |
| Bai, J. X. | 2018 | *** | * | ** | 6 |
| Lee, J. W. | 2010 | *** | ** | * | 6 |
| Liu, P. J. | 2014 | *** | ** | * | 6 |
| Ma, Z. M. | 2020 | *** | ** | *** | 8 |
| Ryu, S. | 2011 | **** | ** | *** | 9 |
| Shih, M. H. | 2012 | *** | ** | ** | 7 |
| Tang, Y. | 2022 | *** | ** | ** | 7 |
| Wei, F. | 2020 | *** | * | ** | 6 |
| Wu, S. J. | 2015 | ** | * | ** | 5 |
| Xie, Y. | 2013 | *** | ** | * | 6 |
| Xu, C. | 2010 | *** | ** | * | 6 |
| Yamada, T. | 2010 | *** | * | ** | 6 |
| Yang, C. | 2022 | *** | ** | *** | 8 |
| Yang, C. | 2017 | *** | ** | ** | 7 |
| Case-Control Study | | | | | |
| Li, Y. | 2017 | *** | * | ** | 6 |

The Newcastle–Ottawa Scale (NOS) scale was used to evaluate the quality of the cohort and case-control studies.

* An asterisk indicator represents obtaining one point in this item.

Table S5 The quality assessment of cross-sectional studies

| Study | Year | 1 | 2 | 3 | 4 | 5 | 6 | 7 | 8 | 9 | 10 | 11 | Total score |
| --- | --- | --- | --- | --- | --- | --- | --- | --- | --- | --- | --- | --- | --- |
| Bao, T. | 2020 | 1 | 1 | 1 | 0 | 1 | 0 | 1 | 1 | 1 | 1 | 0 | 8 |
| Cai, W. | 2014 | 1 | 1 | 1 | 1 | 1 | 0 | 0 | 1 | 0 | 1 | 0 | 7 |
| Cai, W. | 2013 | 1 | 0 | 1 | 0 | 1 | 1 | 0 | 1 | 0 | 1 | 1 | 7 |
| Catanzaro, R. | 2014 | 1 | 1 | 1 | 0 | 1 | 0 | 0 | 1 | 0 | 1 | 0 | 6 |
| Chao, G. Q | 2021 | 1 | 1 | 1 | 1 | 1 | 1 | 0 | 1 | 0 | 1 | 1 | 5 |
| Chen, Y. | 2019 | 1 | 1 | 1 | 0 | 1 | 0 | 1 | 0 | 1 | 0 | 0 | 6 |
| Cho, H. C. | 2016 | 1 | 0 | 1 | 1 | 1 | 0 | 0 | 1 | 0 | 1 | 1 | 7 |
| Cui, L. F. | 2017 | 1 | 1 | 0 | 0 | 1 | 0 | 0 | 1 | 1 | 1 | 0 | 6 |
| Cui, Y. L. | 2021 | 1 | 0 | 1 | 1 | 1 | 1 | 0 | 1 | 0 | 0 | 0 | 6 |
| Fan, N. G. | 2016 | 1 | 0 | 1 | 0 | 1 | 1 | 0 | 1 | 0 | 1 | 1 | 7 |
| Golmohammadi, S. | 2020 | 1 | 1 | 1 | 0 | 1 | 0 | 1 | 0 | 1 | 0 | 0 | 6 |
| Han, L. | 2022 | 1 | 0 | 1 | 1 | 1 | 1 | 0 | 1 | 0 | 1 | 0 | 7 |
| Hu, M. Y. | 2017 | 1 | 1 | 0 | 0 | 1 | 0 | 0 | 1 | 1 | 0 | 0 | 5 |
| Hu, X. Y. | 2018 | 1 | 0 | 1 | 1 | 1 | 1 | 0 | 1 | 0 | 0 | 0 | 6 |
| Hu, Y.M. | 2021 | 1 | 0 | 0 | 0 | 1 | 1 | 0 | 1 | 0 | 1 | 1 | 6 |
| Hwang, I. C. | 2011 | 1 | 1 | 1 | 1 | 1 | 0 | 1 | 0 | 1 | 1 | 0 | 8 |
| Kuo, C. F. | 2010 | 1 | 0 | 1 | 1 | 1 | 0 | 0 | 1 | 0 | 1 | 0 | 6 |
| Lee, K. | 2009 | 1 | 1 | 1 | 0 | 1 | 0 | 1 | 1 | 1 | 1 | 0 | 8 |
| Lee, Y. J. | 2010 | 1 | 1 | 1 | 0 | 1 | 0 | 0 | 1 | 1 | 1 | 1 | 8 |
| Li, Y. M. | 2009 | 1 | 1 | 1 | 0 | 1 | 1 | 1 | 1 | 1 | 1 | 0 | 9 |
| Liu, C. L. | 2022 | 1 | 1 | 1 | 0 | 1 | 0 | 1 | 1 | 1 | 1 | 0 | 8 |
| Liu, C. Q. | 2016 | 1 | 1 | 1 | 0 | 1 | 0 | 0 | 1 | 1 | 1 | 1 | 8 |
| Liu, J. | 2017 | 1 | 1 | 1 | 0 | 1 | 0 | 1 | 0 | 1 | 1 | 0 | 7 |
| Liu, P. J. | 2014 | 1 | 0 | 1 | 1 | 1 | 0 | 0 | 1 | 0 | 1 | 0 | 6 |
| Pan, X. T. | 2020 | 1 | 1 | 0 | 0 | 1 | 0 | 0 | 1 | 1 | 1 | 0 | 6 |
| Shen, Y. | 2019 | 1 | 0 | 1 | 1 | 1 | 1 | 0 | 1 | 0 | 1 | 0 | 7 |
| Sirota, J. C. | 2013 | 1 | 1 | 1 | 0 | 1 | 1 | 1 | 1 | 1 | 1 | 0 | 9 |
| Tung, T. H. | 2011 | 1 | 1 | 1 | 0 | 1 | 0 | 1 | 1 | 0 | 0 | 0 | 6 |
| Wang, M. | 2021 | 1 | 1 | 0 | 0 | 1 | 0 | 0 | 1 | 1 | 1 | 0 | 6 |
| Wang, Z. | 2013 | 1 | 0 | 1 | 1 | 1 | 1 | 0 | 1 | 0 | 0 | 0 | 6 |
| Wu, S. J. | 2015 | 1 | 0 | 0 | 0 | 0 | 1 | 0 | 1 | 0 | 1 | 1 | 5 |
| Yang, C. | 2022 | 1 | 1 | 1 | 0 | 1 | 0 | 1 | 1 | 1 | 1 | 0 | 8 |
| Yang, H. H. | 2018 | 1 | 1 | 1 | 0 | 1 | 0 | 0 | 1 | 1 | 1 | 1 | 8 |
| Yu, H. F. | 2021 | 1 | 0 | 1 | 1 | 1 | 0 | 0 | 0 | 0 | 1 | 0 | 5 |
| Yu, X. L. | 2017 | 1 | 1 | 0 | 0 | 1 | 0 | 0 | 1 | 1 | 0 | 0 | 5 |
| Zhang, S. | 2017 | 1 | 0 | 1 | 1 | 0 | 1 | 0 | 1 | 0 | 0 | 0 | 5 |
| Zheng, X. Y. | 2017 | 1 | 0 | 0 | 0 | 1 | 1 | 0 | 1 | 0 | 1 | 1 | 6 |

Agency for Healthcare Research and Quality (AHRQ) was used to evaluate the quality of cross-sectional studies.

Fig S1. Publication bias of meta-analysis on the association between SUA and NAFLD.

**
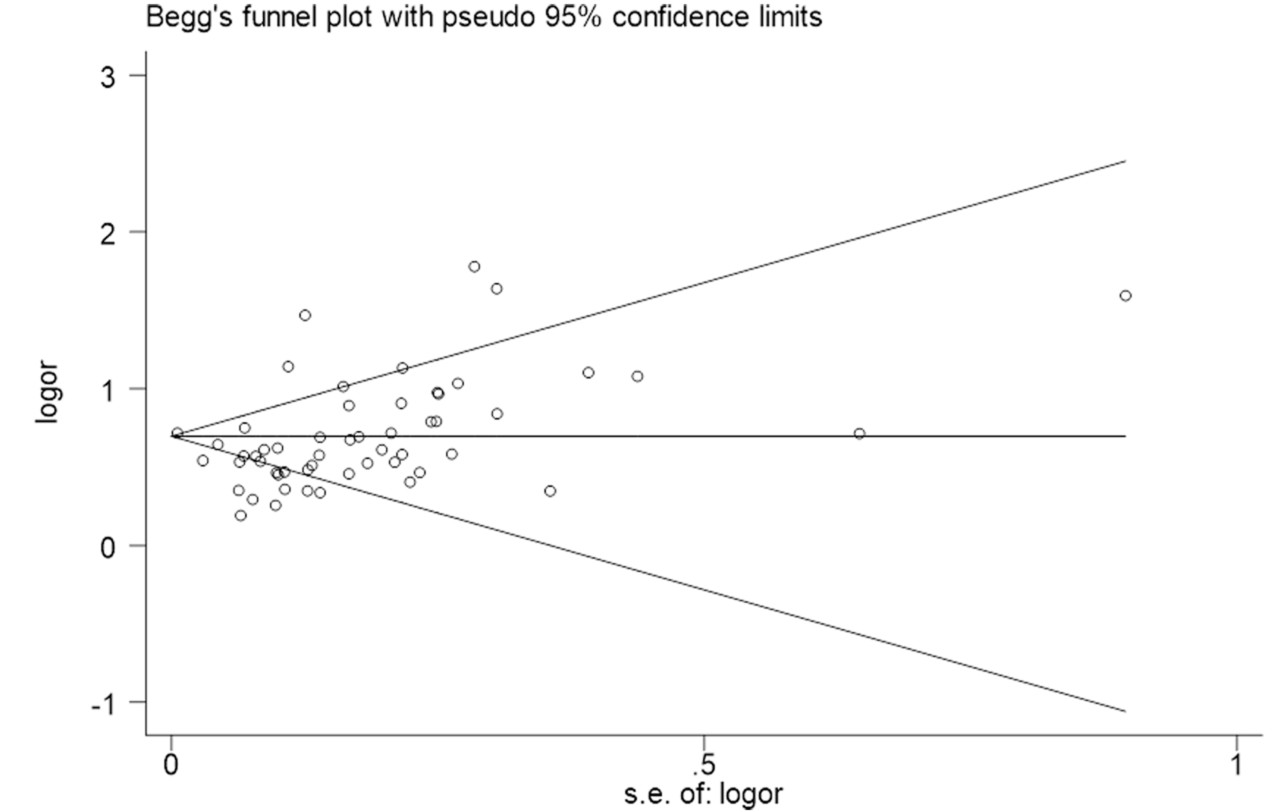
**

**Reference**

1. Bai JX, Shu RM, Huang Y & Peng Z. [Correlation between serum uric acid and risk of new-onset nonalcoholic fatty liver disease: a 5-year observational cohort study]. *Zhonghua Gan Zang Bing Za Zhi* 2018 **26** 271-275.<http://doi.org/10.3760/cma.j.issn.1007-3418.2018.04.008>.

2. Bao T, Ying ZY, Gong L, Du J, Ji GY, Li ZZ, Gao W, Jiang XW, Yang HW, Huang Y & Tang HR. Association between Serum Uric Acid and Nonalcoholic Fatty Liver Disease in Nonobese Postmenopausal Women: A Cross-sectional Study. *Sci Rep* 2020 **10**.<http://doi.org/10.1038/s41598-020-66931-9>.

3. Cai W, Song JM, Zhang B, Sun YP, Yao H & Zhang YX. The prevalence of nonalcoholic fatty liver disease and relationship with serum uric acid level in Uyghur population. *ScientificWorldJournal* 2014 **2014** 393628.<http://doi.org/10.1155/2014/393628>.

4. Cai W, Wu X, Zhang B, Miao L, Sun YP, Zou Y & Yao H. Serum uric acid levels and nonalcoholic fatty liver disease in Uyghur and Han ethnic groups in northwestern China. *Arquivos Brasileiros De Endocrinologia E Metabologia* 2013 **57** 617-622.<http://doi.org/10.1590/s0004-27302013000800006>.

5. Catanzaro R, Calabrese F, Palermo F, Milazzo M, Italia A, Sapienza C, Occhipinti S, Anzalone MG & Castellino P. THE RELATIONSHIP BETWEEN SERUM URIC ACID AND NON ALCOHOLIC FATTY LIVER DISEASE: A CROSS-SECTIONAL RETROSPECTIVE STUDY. *Digestive and Liver Disease* 2014 **46** S114-S114.<http://doi.org/10.1016/S1590-8658(14)60339-X>.

6. Chen Y, Huang Q, Ai P, Liu H, Chen X, Xu X, Ding G, Li Y, Feng X, Wang X, Ji L, Li D & Zhou Y. Association between Serum Uric Acid and Non-Alcoholic Fatty Liver Disease according to Different Menstrual Status Groups. *Can J Gastroenterol Hepatol* 2019 **2019** 2763093.<http://doi.org/10.1155/2019/2763093>.

7. Cho HC. Prevalence and Factors Associated with Nonalcoholic Fatty Liver Disease in a Nonobese Korean Population. *Gut Liver* 2016 **10** 117-125.<http://doi.org/10.5009/gnl14444>.

8. Cui L, Meng L, Wang G, Yuan X, Li Z, Mu R & Wu S. Prevalence and risk factors of hyperuricemia: results of the Kailuan cohort study. *Mod Rheumatol* 2017 **27** 1066-1071.<http://doi.org/10.1080/14397595.2017.1300117>.

9. Cui YL, Liu J, Shi HY, Hu WM, Song L & Zhao Q. Serum uric acid is positively associated with the prevalence of nonalcoholic fatty liver in non-obese type 2 diabetes patients in a Chinese population. *Journal of Diabetes and Its Complications* 2021 **35**.<http://doi.org/10.1016/j.jdiacomp.2021.107874>.

10. Fan NG, Zhang LJ, Xia ZH, Peng L, Wang YF & Peng YD. Sex-Specific Association between Serum Uric Acid and Nonalcoholic Fatty Liver Disease in Type 2 Diabetic Patients. *Journal of Diabetes Research* 2016 **2016**.<http://doi.org/10.1155/2016/3805372>.

11. Han L, Zhang Y, Yue C, Huang Y, Wu Y & Chen J. Preliminary Study on Risk Factors for Morbidity of Nonalcoholic Fatty Liver Disease in High-Income Male Population. *J Healthc Eng* 2022 **2022** 9331284.<http://doi.org/10.1155/2022/9331284>.

12. Hu MY, Liu JB, Zhou CH & Li XL. Analysis of the interaction effects among the risk factors for hyperuricaemia in adults: a cross-sectional survey in Guilin, China. *International Journal of Clinical and Experimental Medicine* 2017 **10** 9376-9386

13. Hu XY, Li Y, Li LQ, Zheng Y, Lv JH, Huang SC, Zhang W, Liu L, Zhao L, Liu Z & Zhao XJ. Risk factors and biomarkers of non-alcoholic fatty liver disease: an observational cross-sectional population survey. *Bmj Open* 2018 **8** e019974.<http://doi.org/10.1136/bmjopen-2017-019974>.

14. Hu Y, Li Q, Min R, Deng Y, Xu Y & Gao L. The association between serum uric acid and diabetic complications in patients with type 2 diabetes mellitus by gender: a cross-sectional study. *Peerj* 2021 **9** e10691.<http://doi.org/10.7717/peerj.10691>.

15. Hwang IC, Suh SY, Suh AR & Ahn HY. The relationship between normal serum uric acid and nonalcoholic fatty liver disease. *J Korean Med Sci* 2011 **26** 386-391.<http://doi.org/10.3346/jkms.2011.26.3.386>.

16. Kuo CF, Yu KH, Luo SF, Chiu CT, Ko YS, Hwang JS, Tseng WY, Chang HC, Chen HW & See LC. Gout and risk of non-alcoholic fatty liver disease. *Scand J Rheumatol* 2010 **39** 466-471.<http://doi.org/10.3109/03009741003742797>.

17. Lee JW, Cho YK, Ryan MC, Kim H, Lee SW, Chang E, Joo KJ, Kim JT, Kim BS & Sung KC. Serum Uric Acid as a Predictor for the Development of Nonalcoholic Fatty Liver Disease in Apparently Healthy Subjects: A 5-Year Retrospective Cohort Study. *Gut and Liver* 2010 **4** 378-383.<http://doi.org/10.5009/gnl.2010.4.3.378>.

18. Lee K. Relationship between uric acid and hepatic steatosis among Koreans. *Diabetes Metab* 2009 **35** 447-451.<http://doi.org/10.1016/j.diabet.2009.04.011>.

19. Lee YJ, Lee HR, Lee JH, Shin YH & Shim JY. Association between serum uric acid and non-alcoholic fatty liver disease in Korean adults. *Clin Chem Lab Med* 2010 **48** 175-180.<http://doi.org/10.1515/cclm.2010.037>.

20. Li Y, Song CL, Yang HH, Song XC, Ma QH, Mao JL, Xu WX & Li XL. [Study about the risk factors of non-alcoholic fatty liver disease among people aged over 60 years old in Suzhou]. *Zhonghua Yu Fang Yi Xue Za Zhi* 2017 **51** 444-446.<http://doi.org/10.3760/cma.j.issn.0253-9624.2017.05.014>.

21. Li Y, Xu C, Yu C, Xu L & Miao M. Association of serum uric acid level with non-alcoholic fatty liver disease: a cross-sectional study. *J Hepatol* 2009 **50** 1029-1034.<http://doi.org/10.1016/j.jhep.2008.11.021>.

22. Liu C, Liu W, Zhang G, Wang Y, Jiang J, Yang Z & Wu W. Conjunctional Relationship between Serum Uric Acid and Serum Nickel with Non-Alcoholic Fatty Liver Disease in Men: A Cross-Sectional Study. *Int J Environ Res Public Health* 2022 **19**.<http://doi.org/10.3390/ijerph19116424>.

23. Liu CQ, He CM, Chen N, Wang DM, Shi XL, Liu YW, Zeng X, Yan B, Liu SH, Yang SY, Li XY, Li XJ & Li ZB. Serum uric acid is independently and linearly associated with risk of nonalcoholic fatty liver disease in obese Chinese adults. *Sci Rep* 2016 **6**.<http://doi.org/10.1038/srep38605>.

24. Liu J, Xu CF, Ying LM, Zang SF, Zhuang ZJ, Lv HF, Yang WJ, Luo Y, Ma XJ, Wang L, Xun YH, Ye DW & Shi JP. Relationship of serum uric acid level with non-alcoholic fatty liver disease and its inflammation progression in non-obese adults. *Hepatology Research* 2017 **47** E104-E112.<http://doi.org/10.1111/hepr.12734>.

25. Liu P, Ma F, Lou H, Zhu Y & Chen Y. [Relationship between normal serum uric acid levels and nonalcoholic fatty liver disease in postmenopausal women]. *Zhonghua Gan Zang Bing Za Zhi* 2014 **22** 53-57.<http://doi.org/10.3760/cma.j.issn.1007-3418.2014.01.012>.

26. Liu PJ, Ma F, Lou HP, Zhu YN & Chen Y. Relationship between serum uric acid levels and hepatic steatosis in non-obese postmenopausal women. *Climacteric* 2014 **17** 692-699.<http://doi.org/10.3109/13697137.2014.926323>.

27. Ma ZM, Zhang JB, Kang XP, Xu CN, Sun C, Tao LX, Zheng DQ, Han YM, Li Q, Guo XH & Yang XH. Hyperuricemia precedes non-alcoholic fatty liver disease with abdominal obesity moderating this unidirectional relationship: Three longitudinal analyses. *Atherosclerosis* 2020 **311** 44-51.<http://doi.org/10.1016/j.atherosclerosis.2020.08.006>.

28. Pan XT, Xie XX, Peng HW, Cai XL, Li HQ, Hong QZ, Wu YL, Lin X, Xu SH & Peng XE. Risk Prediction for Non-alcoholic Fatty Liver Disease Based on Biochemical and Dietary Variables in a Chinese Han Population. *Frontiers in Public Health* 2020 **8**.<http://doi.org/10.3389/fpubh.2020.00220>.

29. Ryu S, Chang Y, Kim SG, Cho J & Guallar E. Serum uric acid levels predict incident nonalcoholic fatty liver disease in healthy Korean men. *Metabolism* 2011 **60** 860-866.<http://doi.org/10.1016/j.metabol.2010.08.005>.

30. Shen Y, Wang Y, Chang C, Li S, Li W & Ni B. Prevalence and risk factors associated with hyperuricemia among working population at high altitudes: a cross-sectional study in Western China. *Clin Rheumatol* 2019 **38** 1375-1384.<http://doi.org/10.1007/s10067-018-4391-9>.

31. Shih MH, Lazo M, Liu SH, Bonekamp S, Hernaez R & Clark JM. Association between serum uric acid and nonalcoholic fatty liver disease in the US population. *J Formos Med Assoc* 2015 **114** 314-320.<http://doi.org/10.1016/j.jfma.2012.11.014>.

32. Sirota JC, McFann K, Targher G, Johnson RJ, Chonchol M & Jalal DI. Elevated serum uric acid levels are associated with non-alcoholic fatty liver disease independently of metabolic syndrome features in the United States: Liver ultrasound data from the National Health and Nutrition Examination Survey. *Metabolism* 2013 **62** 392-399.<http://doi.org/10.1016/j.metabol.2012.08.013>.

33. Tang Y, Xu Y, Liu P, Liu C, Zhong R, Yu X, Xiao L, Du M, Yang L, Yuan J, Wang Y, Chen W, Wei S, Liang Y, Zhang X, Wu T, He M, Miao X & Yao P. No Evidence for a Causal Link between Serum Uric Acid and Nonalcoholic Fatty Liver Disease from the Dongfeng-Tongji Cohort Study. *Oxid Med Cell Longev* 2022 **2022** 6687626.<http://doi.org/10.1155/2022/6687626>.

34. Tung TH, Chang TH, Chiu WH, Lin TH, Shih HC, Chang MH & Liu JH. Clinical correlation of nonalcoholic fatty liver disease in a Chinese taxi drivers population in Taiwan: Experience at a teaching hospital. *BMC Res Notes* 2011 **4** 315.<http://doi.org/10.1186/1756-0500-4-315>.

35. Wang M, Wang M, Zhang R, Zhang L, Ding Y, Tang Z, Fan H, Wang H, Zhang W, Chen Y & Wang J. A combined association of serum uric acid, alanine aminotransferase and waist circumference with non-alcoholic fatty liver disease: a community-based study. *Peerj* 2022 **10** e13022.<http://doi.org/10.7717/peerj.13022>.

36. Wang Z, Xu M, Peng J, Jiang L, Hu Z, Wang H, Zhou S, Zhou R, Hultström M & Lai EY. Prevalence and associated metabolic factors of fatty liver disease in the elderly. *Exp Gerontol* 2013 **48** 705-709.<http://doi.org/10.1016/j.exger.2013.05.059>.

37. Wei F, Li J, Chen C, Zhang K, Cao L, Wang X, Ma J, Feng S & Li WD. Higher Serum Uric Acid Level Predicts Non-alcoholic Fatty Liver Disease: A 4-Year Prospective Cohort Study. *Front Endocrinol (Lausanne)* 2020 **11** 179.<http://doi.org/10.3389/fendo.2020.00179>.

38. Wu SJ, Zhu GQ, Ye BZ, Kong FQ, Zheng ZX, Zou H, Shi KQ, Lin L, Braddock M, Huang WJ, Chen YP & Zheng MH. Association between sex-specific serum uric acid and non-alcoholic fatty liver disease in Chinese adults: a large population-based study. *Medicine (Baltimore)* 2015 **94** e802.<http://doi.org/10.1097/md.0000000000000802>.

39. Xie Y, Wang M, Zhang Y, Zhang S, Tan A, Gao Y, Liang Z, Shi D, Huang Z, Zhang H, Yang X, Lu Z, Wu C, Liao M, Sun Y, Qin X, Hu Y, Li L, Peng T, Li Z, Yang X & Mo Z. Serum uric acid and non-alcoholic fatty liver disease in non-diabetic Chinese men. *Plos One* 2013 **8** e67152.<http://doi.org/10.1371/journal.pone.0067152>.

40. Xu C, Yu C, Xu L, Miao M & Li Y. High serum uric acid increases the risk for nonalcoholic Fatty liver disease: a prospective observational study. *Plos One* 2010 **5** e11578.<http://doi.org/10.1371/journal.pone.0011578>.

41. Yamada T, Suzuki S, Fukatsu M, Wada T, Yoshida T & Joh T. Elevated serum uric acid is an independent risk factor for nonalcoholic fatty liver disease in Japanese undergoing a health checkup. *Acta Gastroenterol Belg* 2010 **73** 12-17

42. Yang C, He Q, Chen Z, Qin JJ, Lei F, Liu YM, Liu W, Chen MM, Sun T, Zhu Q, Wu Y, Zhuo M, Cai J, Mao W & Li H. A Bidirectional Relationship Between Hyperuricemia and Metabolic Dysfunction-Associated Fatty Liver Disease. *Front Endocrinol (Lausanne)* 2022 **13** 821689.<http://doi.org/10.3389/fendo.2022.821689>.

43. Yang C, Yang SJ, Xu WW, Zhang JH, Fu WG & Feng CH. Association between the hyperuricemia and nonalcoholic fatty liver disease risk in a Chinese population: A retrospective cohort study. *Plos One* 2017 **12**.<http://doi.org/10.1371/journal.pone.0177249>.

44. Yang HH, Li DM, Song XC, Liu F, Wang XJ, Ma QH, Zhang X & Li XL. Joint associations of serum uric acid and ALT with NAFLD in elderly men and women: a Chinese cross-sectional study. *Journal of Translational Medicine* 2018 **16**.<http://doi.org/10.1186/s12967-018-1657-6>.

45. Yu HF, Zhao L, Liu LJ, Li YF, Sun J & Liu YD. Relationship between serum uric acid level and nonalcoholic fatty liver disease in type 2 diabetes patients. *Medicine* 2021 **100**.<http://doi.org/10.1097/md.0000000000026946>.

46. Yu XL, Shu L, Shen XM, Zheng XY & Zheng PF. Gender difference on the relationship between hyperuricemia and nonalcoholic fatty liver disease among Chinese An observational study. *Medicine* 2017 **96**.<http://doi.org/10.1097/md.0000000000008164>.

47. Zhang S, Du T, Li M, Lu H, Lin X & Yu X. Combined effect of obesity and uric acid on nonalcoholic fatty liver disease and hypertriglyceridemia. *Medicine (Baltimore)* 2017 **96** e6381.<http://doi.org/10.1097/md.0000000000006381>.

48. Zheng XY, Gong LL, Luo R, Chen H, Peng B, Ren W & Wang YH. Serum uric acid and non-alcoholic fatty liver disease in non-obesity Chinese adults. *Lipids in Health and Disease* 2017 **16**.<http://doi.org/10.1186/s12944-017-0531-5>.

49. Chao G & Chen L. Study on the independent effect of thyroid hormone based on uric acid level on NAFLD. *J Health Popul Nutr* 2021 **40** 21.<http://doi.org/10.1186/s41043-021-00247-w>.

50. Golmohammadi S, Tavasoli M & Asadi N. Prevalence and Risk Factors of Hyperuricemia in Patients with Chronic Kidney Disease and Non-Alcoholic Fatty Liver. *Clin Exp Gastroenterol* 2020 **13** 299-304.<http://doi.org/10.2147/ceg.S253619>.
